# Supplementary material for: Efficient In Silico Saturation Mutagenesis of a Member of the Caspase Protease Family
Source: PubMed Central journal article supplement (PMC8023567; doi:10.1021/acs.jcim.0c01216), 2021-02-11
Supplement: ci0c01216_si_001.pdf [file ci0c01216_si_001.pdf]

Supporting Information:  
Efficient *In Silico* Saturation Mutagenesis of a  
Member of the *Caspase* Protease Family

Christoph Öhlknecht,<sup>†,‡</sup> Sonja Katz,<sup>†,‡</sup> Christina Kroess,<sup>¶,‡</sup> Bernhard Sprenger,<sup>¶,‡</sup>  
Petra Engele,<sup>¶,‡</sup> Rainer Schneider,<sup>¶</sup> and Chris Oostenbrink<sup>\*,†</sup>

<sup>†</sup>*Institute of Molecular Modeling and Simulation, University of Natural Resources and Life  
Sciences, Vienna, Austria*

<sup>‡</sup>*Austrian Centre of Industrial Biotechnology, Petersgasse 14, Graz, Austria*

<sup>¶</sup>*Institute of Biochemistry and Center of Molecular Biosciences Innsbruck, University of  
Innsbruck, Austria*

E-mail: [chris.oostenbrink@boku.ac.at](mailto:chris.oostenbrink@boku.ac.at)

**Figure S1: Amino-Acid Sequence of cp-Casp2** with N-terminal His Tag, GS linker, CEESA and E105V and G171D substitution (SEQ ID No. 253)

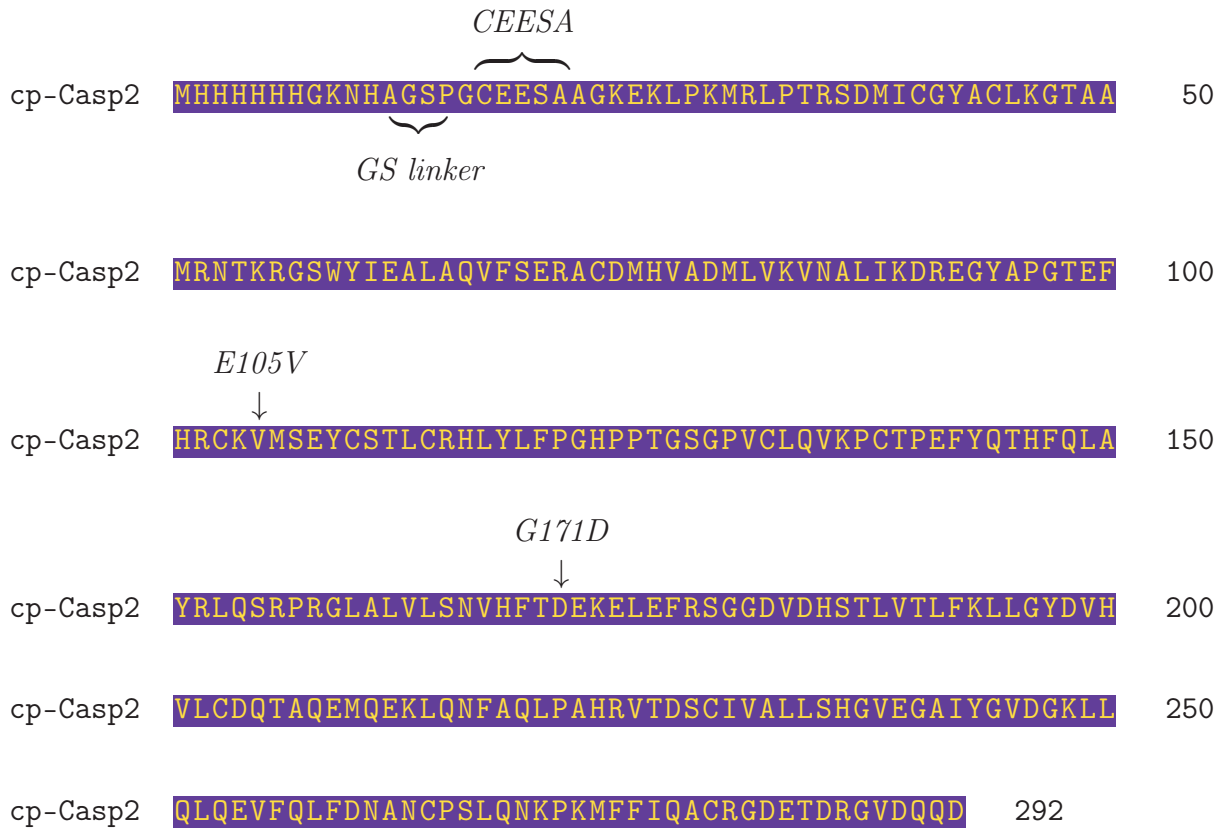

Table S1: Extracted polar and nonpolar energies from the TPF trajectories and free energies from the LIE method for the E105 mutation and P1'=Ile. All values are reported in kJ/mol.

| Mut  | $\langle E_{apo}^{el} \rangle$ | $\langle E_{apo}^{vdw} \rangle$ | $\langle E_{liq}^{el} \rangle$ | $\langle E_{liq}^{vdw} \rangle$ | LIE    |
|------|--------------------------------|---------------------------------|--------------------------------|---------------------------------|--------|
| Arg  | -871.37                        | -89.37                          | -852.42                        | -92.21                          | 9.03   |
| Asn  | -665.68                        | -51.41                          | -678.73                        | -39.35                          | -4.60  |
| Asp  | -1223.10                       | -22.74                          | -1140.36                       | -21.01                          | 41.65  |
| Cys  | -290.97                        | -53.63                          | -264.61                        | -56.20                          | 12.77  |
| Gln  | -657.75                        | -73.34                          | -660.36                        | -72.65                          | -1.19  |
| Glu  | -1311.72                       | -33.29                          | -1299.73                       | -22.89                          | 7.66   |
| HisA | -200.21                        | -93.09                          | -171.90                        | -100.59                         | 12.95  |
| HisB | -260.05                        | -93.73                          | -262.27                        | -87.25                          | -0.08  |
| Lys  | -982.84                        | -66.61                          | -1010.21                       | -61.77                          | -12.91 |
| Met  | -73.71                         | -115.36                         | -57.83                         | -122.71                         | 6.77   |
| Phe  | -19.24                         | -148.96                         | -18.60                         | -146.08                         | 0.78   |
| Ser  | -177.16                        | -24.28                          | -182.49                        | -25.57                          | -2.87  |
| Thr  | -154.55                        | -45.36                          | -159.72                        | -44.78                          | -2.49  |
| Trp  | -143.86                        | -184.88                         | -159.32                        | -187.44                         | -8.14  |
| Tyr  | -301.66                        | -146.49                         | -283.48                        | -138.17                         | 10.42  |

Table S2: Extracted polar and nonpolar energies from the TPF trajectories and free energies from the LIE method for the E105 mutation and P1'=Pro. All values are reported in kJ/mol.

| Mut  | $\langle E_{apo}^{el} \rangle$ | $\langle E_{apo}^{vdw} \rangle$ | $\langle E_{liq}^{el} \rangle$ | $\langle E_{liq}^{vdw} \rangle$ | LIE    |
|------|--------------------------------|---------------------------------|--------------------------------|---------------------------------|--------|
| Arg  | -869.56                        | -92.42                          | -854.19                        | -81.03                          | 9.51   |
| Asn  | -643.42                        | -51.82                          | -626.20                        | -58.32                          | 7.57   |
| Asp  | -1252.19                       | -5.54                           | -1292.90                       | 2.41                            | -19.08 |
| Cys  | -286.77                        | -58.28                          | -254.62                        | -57.60                          | 16.18  |
| Gln  | -654.18                        | -72.90                          | -660.20                        | -72.15                          | -2.89  |
| Glu  | -1234.53                       | -36.43                          | -1180.39                       | -30.63                          | 28.00  |
| HisA | -204.49                        | -89.75                          | -198.68                        | -87.32                          | 3.29   |
| HisB | -272.79                        | -90.54                          | -260.75                        | -88.34                          | 6.37   |
| Lys  | -1045.93                       | -60.50                          | -1011.15                       | -62.71                          | 17.03  |
| Met  | -62.55                         | -128.33                         | -57.81                         | -123.23                         | 3.19   |
| Phe  | -17.55                         | -154.52                         | -23.31                         | -147.39                         | -1.74  |
| Ser  | -188.67                        | -20.34                          | -178.57                        | -20.16                          | 5.08   |
| Thr  | -165.12                        | -40.58                          | -147.50                        | -39.56                          | 8.97   |
| Trp  | -158.20                        | -165.02                         | -162.20                        | -167.95                         | -2.4   |
| Tyr  | -289.64                        | -139.99                         | -274.31                        | -139.76                         | 7.70   |

Table S3: Extracted polar and nonpolar energies from the TPF trajectories and free energies from the LIE method for the G171 mutation and P1'=Ile. All values are reported in kJ/mol.

| Mut  | $\langle E_{apo}^{el} \rangle$ | $\langle E_{apo}^{vdw} \rangle$ | $\langle E_{liq}^{el} \rangle$ | $\langle E_{liq}^{vdw} \rangle$ | LIE   |
|------|--------------------------------|---------------------------------|--------------------------------|---------------------------------|-------|
| Arg  | -917.79                        | -57.34                          | -910.22                        | -51.34                          | 4.75  |
| Asn  | -664.39                        | -36.07                          | -665.79                        | -32.06                          | -0.06 |
| Asp  | -1513.41                       | 36.22                           | -1505.20                       | 37.01                           | 4.23  |
| Cys  | -315.58                        | -43.34                          | -295.22                        | -52.00                          | 8.80  |
| Gln  | -667.49                        | -56.25                          | -668.42                        | -54.62                          | -0.20 |
| Glu  | -1504.26                       | 17.01                           | -1505.07                       | 17.79                           | -0.28 |
| HisA | -213.20                        | -68.99                          | -215.14                        | -65.22                          | -0.37 |
| HisB | -287.39                        | -69.56                          | -285.82                        | -70.56                          | 0.62  |
| Lys  | -1048.83                       | -37.04                          | -1056.49                       | -38.43                          | -4.05 |
| Met  | -64.58                         | -102.48                         | -61.55                         | -101.80                         | 1.62  |
| Phe  | -29.53                         | -120.15                         | -29.49                         | -121.06                         | -0.13 |
| Ser  | -186.98                        | -15.60                          | -179.66                        | -17.13                          | 3.42  |
| Thr  | -162.57                        | -37.87                          | -180.11                        | -25.18                          | -6.74 |
| Trp  | -184.38                        | -149.14                         | -190.09                        | -142.74                         | -1.83 |
| Tyr  | -313.70                        | -99.41                          | -313.60                        | -100.82                         | -0.18 |

Table S4: Extracted polar and nonpolar energies from the TPF trajectories and free energies from the LIE method for the G171 mutation and P1'=Pro. All values are reported in kJ/mol.

| Mut  | $\langle E_{apo}^{el} \rangle$ | $\langle E_{apo}^{vdw} \rangle$ | $\langle E_{liq}^{el} \rangle$ | $\langle E_{liq}^{vdw} \rangle$ | LIE    |
|------|--------------------------------|---------------------------------|--------------------------------|---------------------------------|--------|
| Arg  | -791.10                        | -62.05                          | -794.02                        | -66.65                          | -2.20  |
| Asn  | -652.55                        | -50.99                          | -662.16                        | -48.69                          | -4.44  |
| Asp  | -1078.95                       | -16.79                          | -1082.22                       | -9.76                           | -0.51  |
| Cys  | -489.67                        | -60.48                          | -476.38                        | -57.66                          | 7.09   |
| Gln  | -665.31                        | -66.00                          | -662.68                        | -59.35                          | 2.38   |
| Glu  | -1077.79                       | -23.84                          | -1078.37                       | -22.89                          | -0.13  |
| HisA | -441.59                        | -66.98                          | -436.01                        | -66.38                          | 2.89   |
| HisB | -479.41                        | -69.55                          | -470.92                        | -68.55                          | 4.40   |
| Lys  | -854.37                        | -51.24                          | -860.06                        | -51.14                          | -2.83  |
| Met  | -334.64                        | -86.66                          | -364.31                        | -82.43                          | -14.16 |
| Phe  | -354.67                        | -97.06                          | -347.34                        | -94.02                          | 4.15   |
| Ser  | -420.03                        | -40.86                          | -425.31                        | -37.21                          | -2.05  |
| Thr  | -428.14                        | -47.64                          | -418.93                        | -47.52                          | 4.62   |
| Trp  | -418.79                        | -115.69                         | -419.79                        | -107.73                         | 0.77   |
| Tyr  | -485.45                        | -82.60                          | -482.26                        | -82.88                          | 1.55   |
